# Supplementary material for: Fronts and waves of actin polymerization in a bistability-based mechanism of circular dorsal ruffles
Source: PubMed Central journal article supplement (PMC5481797; doi:10.1038/ncomms15863), 2017-06-19
Supplement: ncomms15863-s1.pdf [file ncomms15863-s1.pdf]

## Supplementary Note 1

4 **Secondary wavefronts of arap1 behind wavefronts of actin.** Recently,  
5 it has been shown that Arap1 forms a secondary wavefront in the interior of  
6 the wavefront of polymerized actin in CDRs [1]. Supplementary Fig. 1 shows a  
7 kymograph that was sampled from a time-lapse sequence obtained by Hasegawa  
8 et al [33] (see specifically Figure 2A, therein). High concentrations of Arap1 are  
9 only found in the CDR interior. Note that this also holds for the phase of  
10 CDR contraction. The relative positions of the maxima of polymerized actin  
11 and Arap1 are therefore different between expanding and contracting CDRs;  
12 note that for the expanding wavefront there is a pronounced peak of Arap1  
13 following that of actin, whereas for the reversing wave both peaks co-localize, as  
14 indicated by the yellowish colors in Supplementary Fig. 1B. We found the same  
15 phenomenon in the results of our simulations (compare Supplementary Fig. 1B  
16 to Figure 4B and C in the main text).

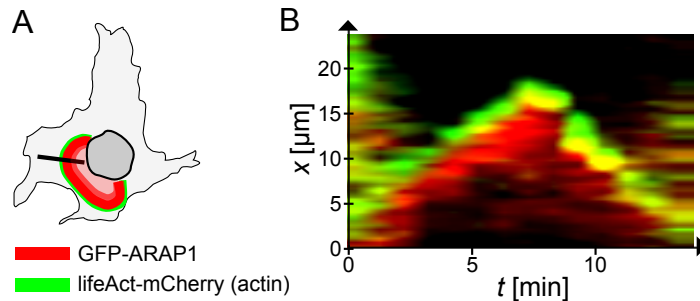

Supplementary Figure 1: *Secondary wavefront of Arap1 in the interior of the wavefront of actin in CDRs.* (A) sketch of the cell exhibiting a CDR and the relative positions of the wavefronts of actin (stained by lifeAct-mCherry) and Arap1. The straight black line highlights the position along which the kymograph was (B) taken.

## Supplementary Note 2

18 **The physical model.** The dimensionless Eq. (1)-(4) in the main text have  
 19 been obtained from a physical model together with a change in variables and  
 20 parameters.

21 We consider the following four fields of protein densities

- 22 1. branched actin in CDRs ( $c_b$ )
- 23 2. filamentous actin of stress fibers and the cell cortex ( $c_f$ )
- 24 3. monomeric actin subunits ( $c_g$ )
- 25 4. inhibitor of actin polymerization ( $c_i$ )

26 as introduced in the main text (section "bistable actin organization within  
 27 CDRs") and Figure 2. The model equations read

$$\frac{\partial c_b}{\partial t} = k_p \frac{c_b^2 c_g}{k_i + c_i} - k_d c_b + D_b \Delta c_b \quad (1a)$$

$$\frac{\partial c_f}{\partial t} = k_{f1} \frac{c_g}{k_i + c_i} - k_{f2} c_f \quad (1b)$$

$$\frac{\partial c_g}{\partial t} = -k_p \frac{c_b^2 c_g}{k_i + c_i} + k_d c_b - k_{f1} \frac{c_g}{k_i + c_i} + k_{f2} c_f + D_g \Delta c_g \quad (1c)$$

$$\frac{\partial c_i}{\partial t} = k_{i1} c_b - k_{i2} c_i + D_i \Delta c_i. \quad (1d)$$

28 Here  $k_p$  describes the kinetics of autocatalytic/cooperative actin polymerization  
 29 inhibited by the inhibitory complex. The saturation parameter of the latter is  
 30 given by  $k_i$ . Polymerized actin is subject to spontaneous decay and severing,  
 31 described by the kinetic constant  $k_d$ . The diffusivity of branched actin at the  
 32 membrane (including the corresponding promoting proteins of branching) is  
 33 given by  $D_b$ . The corresponding terms for the spontaneous polymerization of  
 34 actin of stress fibers and the cell cortex have the kinetic constant of polymer-  
 35 ization  $k_{f1}$  and depolymerization  $k_{f2}$ . The dynamics of the globular actin is  
 36 conserving the total actin concentration and further considers fast diffusion of  
 37 actin monomers having a diffusivity of  $D_g$ . The inhibitory complex is activated  
 38 at a rate  $k_{i1}$  proportional to the concentration of branched CDR actin and sub-  
 39 ject to spontaneous decay described by the kinetic constant  $k_{i2}$ . The diffusion  
 40 constant of the inhibitory complex is given by  $D_i$ .

To obtain the dimensionless forms Eq. (1)-(4), we introduce

$$\begin{aligned} x' &= x/x_0 & \text{with } x_0 &= \sqrt{D_g/k_d} \\ t' &= t/t_0 & \text{with } t_0 &= 1/k_d \\ G &= c_g/g_0 & \text{with } g_0 &= b_0 \\ B &= c_b/b_0 & \text{with } b_0 &= \sqrt{k_d k_i/k_p} \\ F &= c_f/f_0 & \text{with } f_0 &= b_0 \\ I &= c_i/i_0 & \text{with } i_0 &= k_i \end{aligned}$$

44 and respectively,

$$\begin{aligned}\tilde{D}_b &= D_b/D_g \\ \tilde{k}_{i1} &= k_{i1}/(k_d k_i) \quad \text{and} \quad \tilde{k}_{f1} = \frac{k_{f1}}{k_d k_i} \\ \tilde{k}_{i2} &= k_{i2}/k_d \quad \text{and} \quad \tilde{k}_{f2} = k_{f2}/k_d. \\ \tilde{D}_i &= D_i/D_g\end{aligned}$$

47 In the main text we dropped the tildes.

### Supplementary Note 3

49 **Fixed points.** At the spatially homogeneous fixed points of the system  
50 Eq. (1)-(4) the CDR incorporated actin  $B$  takes the following values

$$B_0^* = 0 \tag{2a}$$

$$B_{1\pm}^* = \frac{(A-a)}{2} \pm \sqrt{\frac{(A-a)^2}{4} - (1+\alpha)}. \tag{2b}$$

51 Here  $A = G^* + B^* + F^*$  is the total actin density in the system,  $a = \tilde{k}_{i1}/\tilde{k}_{i2}$   
52 the ratio of the kinetic constants of the inhibitory complex  $I$ , and  $\alpha = \tilde{k}_{f1}/\tilde{k}_{f2}$   
53 the ratio of the kinetic constants of the cortical and stress fiber actin  $F$ . The  
54 fixed point with  $B_0^*$  is always stable, whereas  $B_{1\pm}^*$  undergoes the bifurcations  
55 that are described in the main text. The respective other components of the  
56 fixed point are:

$$F_{0,1\pm}^* = \alpha \frac{A - B_{0,1\pm}^*}{\alpha + (1 + aB_{0,1\pm}^*)} \tag{3a}$$

$$G_{0,1\pm}^* = A - B_{0,1\pm}^* - F_{0,1\pm}^* \tag{3b}$$

$$I_{0,1\pm}^* = aB_{0,1\pm}^*. \tag{3c}$$

### Supplementary Note 4

58 **Bistability of counter propagating front solutions.** To demonstrate  
59 the counter-propagation of wavefronts, we initiate half of the domain  $(-60, 0)$   
60 at the stable fixed point  $\mathbf{P}_0^*$  and the other half  $(0, 60)$  at the fixed point  $\mathbf{P}_{1+}^*$   
61 . Supplementary Fig. 2A shows a close up of the profile around the origin of  
62 the domain. With this initial condition, the system evolves as  $\mathbf{P}_{1+}^*$  invades the

63 state  $\mathbf{P}_0^*$  (Supplementary Fig. 2B). This situation corresponds to the expansion  
 64 phase of CDRs.

65 Next, we make a small, localized perturbation in the field  $G$  (in form of a  
 66 Gauss curve of negative amplitude, Supplementary Fig. 2D), all other fields are  
 67 unchanged. From this initial condition the front propagates into the reverse  
 68 direction (Supplementary Fig. 2E), with  $\mathbf{P}_0^*$  invading  $\mathbf{P}_{1+}^*$ .

69 In the bistable regime the robust mechanism of wave reversal at boundaries  
 70 persists and waves will continue to collapse back to points, regardless of the  
 71 domain geometry. Supplementary Fig. 3 shows a time-lapse of wave dynamics  
 72 on an asymmetric domain.

73 Experimentally, CDRs colliding head on are observed to mutually annihilate  
 74 locally forming fused CDRs [2]. The bistability in our model naturally gives rise  
 75 to this dynamics upon wavefront collisions as shown in Supplementary Fig. 4.

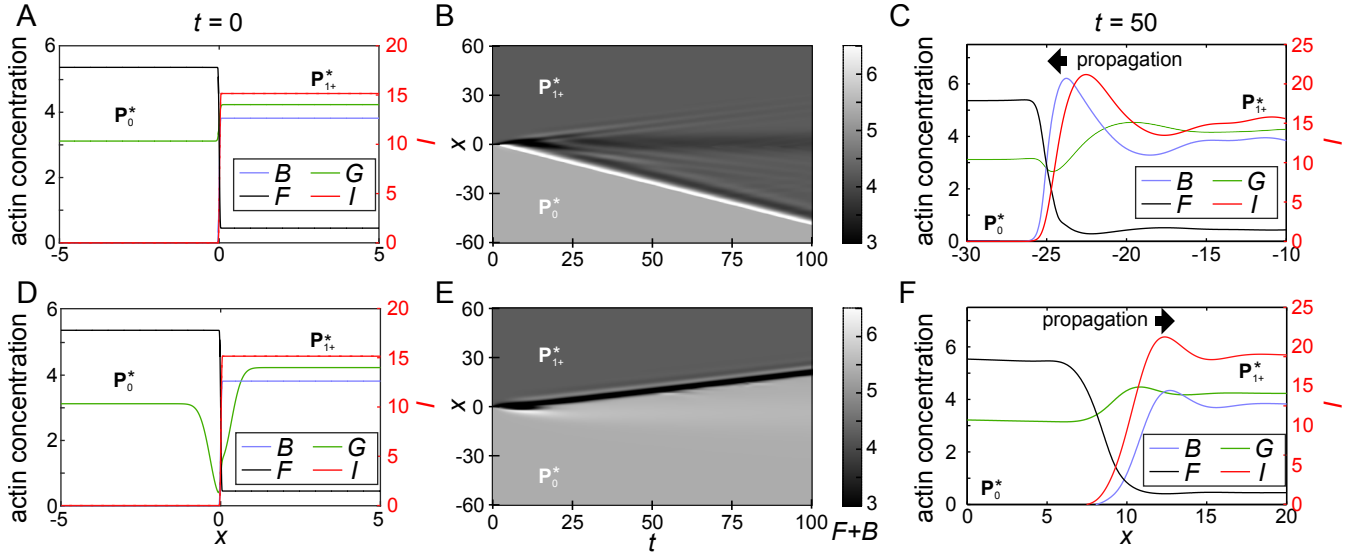

Supplementary Figure 2: *Counter-propagating front solutions.* (A-C) Front solutions in which the state  $\mathbf{P}_{1+}^*$  invades  $\mathbf{P}_0^*$ . (A) Initial profiles of the fields around the origin of the domain  $(-60, 60)$ . (B) kymograph. (C) profiles of the fields at  $t = 50$ . (D-F) The respective plots for a front solution in which the state  $\mathbf{P}_0^*$  invades  $\mathbf{P}_{1+}^*$ . Note that the only difference between the two simulations is the slight deviation of the  $G$  field in the initial profile (compare (A) and (D)). Parameters:  $D_b = 0.12$ ,  $k_{i1} = 2.09$ ,  $k_{i2} = 0.53$ ,  $k_{f1} = 2.05$ ,  $k_{f2} = 1.19$ ,  $A = 8.5$ , domain length: 60, grid size: 0.05.

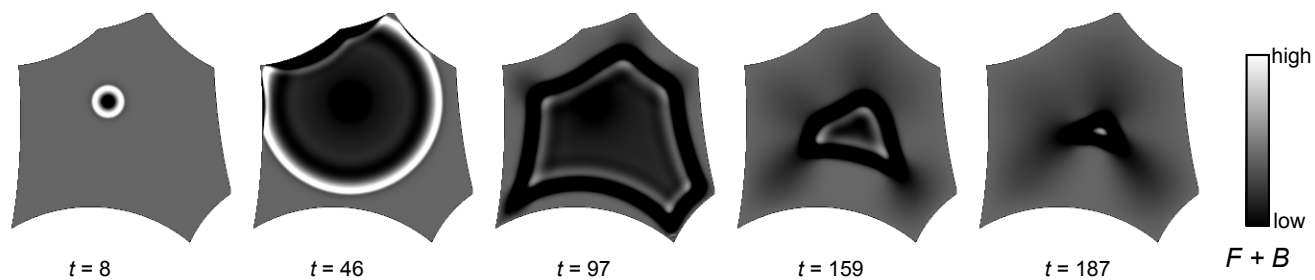

Supplementary Figure 3: *Dynamics of the system in the bistable regime on an asymmetric domain.* Time stamps are with respect to the start of the simulation at  $t = 0$ . Parameters:  $D_b = 0.12$ ,  $k_{i1} = 2.09$ ,  $k_{i2} = 0.53$ ,  $k_{f1} = 2.05$ ,  $k_{f2} = 1.19$ ,  $A = 9.67$ , maximal domain diameter: ca. 50, maximal mesh size: 0.5.

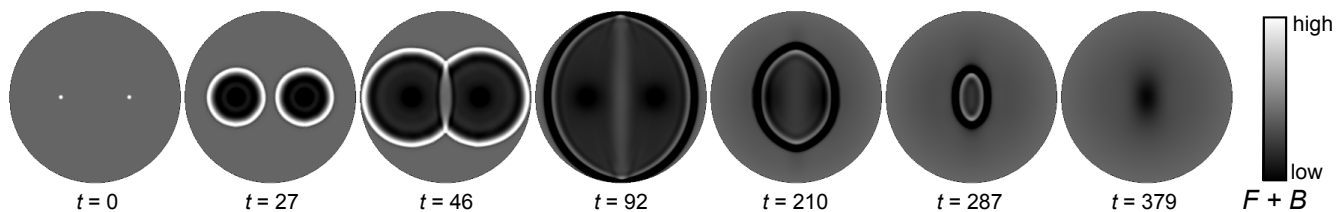

Supplementary Figure 4: Numerical results exhibiting wavefront collision of initially two expanding ring-shaped wavefronts. Upon collision the wavefronts mutually locally annihilate giving rise to one fused structure. Parameters:  $D_b = 0.12$ ,  $k_{i1} = 2.09$ ,  $k_{i2} = 0.53$ ,  $k_{f1} = 2.05$ ,  $k_{f2} = 1.19$ ,  $A = 9.67$ , domain radius: 50, maximal mesh size: 0.5.

## Supplementary Note 5

77 **Simulation of growth factor stimulated CDRs.** It is a common strategy  
78 in the research on CDRs to stimulate their formation via growth factors such as  
79 PDGF [3, 4]. Cells utilize receptor tyrosine kinases to transmit specific binding  
80 events between growth factors and the respective receptors into the cell interior  
81 where signaling cascades are triggered that lead to CDR formation. Since  
82 growth factors are not spatially confined to specific regions of the cell membrane  
83 stimulation results in a spatially extended region of excitation. Correspondingly,  
84 upon growth factor stimulation CDRs are usually not observed to initiate from  
85 points but spatially extended excited regions (see, e.g., Supplementary Fig. 5A).

We simulate the respective behavior by excitation of system (Eq. (1)-(4))  
87 by a field of normally distributed random values. Similar to the behavior of  
88 CDRs upon growth factor stimulation, the system initially forms small short-  
89 living wave structures and eventually one ring-shaped front surrounding the  
90 excited domain (Supplementary Fig. 5B). The front contracts and collapses to  
91 one point, which is in accord with the dynamics of CDRs after growth factor  
92 simulation.

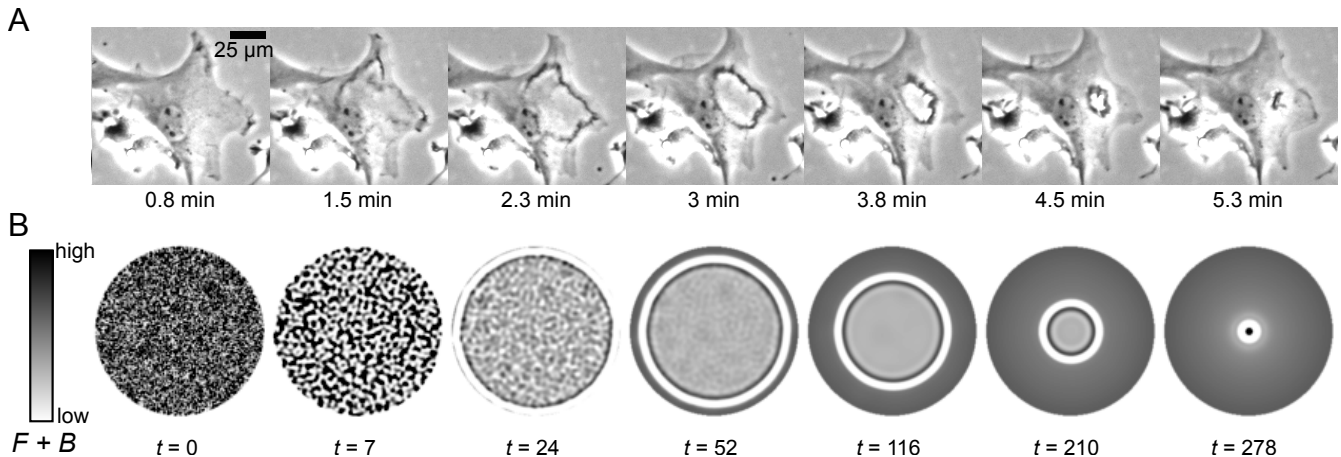

Supplementary Figure 5: *Simulating growth factor-induced CDR formation.* (A) Growth factor-induced CDR formation. Time points with respect to growth factor addition (PDGF). (B) Dynamics of the system upon stimulation with a field of random numbers. Parameters:  $D_b = 0.12$ ,  $k_{i1} = 2.09$ ,  $k_{i2} = 0.53$ ,  $k_{f1} = 2.05$ ,  $k_{f2} = 1.19$ ,  $A = 9.67$ , domain radius: 50, maximal mesh size: 0.5.

## Supplementary References

- 94 [1] J. Hasegawa, K. Tsujita, T. Takenawa, and T. Itoh, “Arap1 regulates the ring size of circular dorsal ruffles through arf1 and arf5,” *Mol. Biol. Cell*,

vol. 23, no. 13, pp. 2481–89, 2012.

- 97 [2] E. Bernitt, C. G. Koh, N. Gov, and H.-G. Döbereiner, “Dynamics of actin  
98 waves on patterned substrates: A quantitative analysis of circular dorsal  
99 ruffles,” *PLoS ONE*, vol. 10, no. 1, p. e0115857, 2015.
- 100 [3] T. Itoh and J. Hasegawa, “Mechanistic insights into the regulation of circular  
101 dorsal ruffle formation,” *J. Biochem.*, vol. 153, no. 1, pp. 21–29, 2012.
- 102 [4] J.-L. Hoon, W.-K. Wong, and C.-G. Koh, “Functions and regulation of cir-  
103 cular dorsal ruffles,” *Mol. Cell. Biol.*, vol. 32, no. 21, pp. 4246–57, 2012.
